# Supplementary material for: HDAC1-Mediated lncRNA Stimulatory Factor of Follicular Development to Inhibit the Apoptosis of Granulosa Cells and Regulate Sexual Maturity through miR-202-3p-COX1 Axis
Source: MDPI journal article supplement (doi:10.3390/cells12232734), 2023-11-29

Raw images of western blot used in the figures:

1.The original blots shown in Figure 1H.

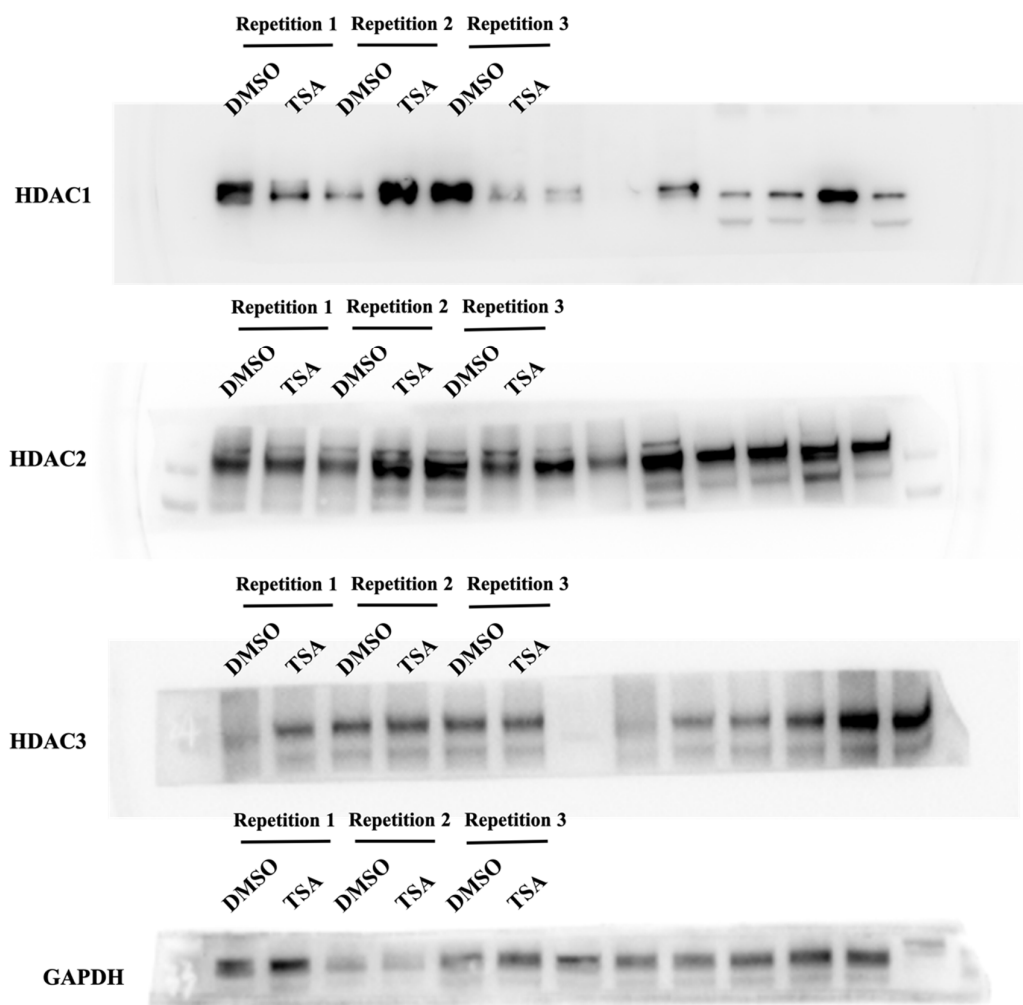

2.The original blots shown in Figure 2F and 2M.

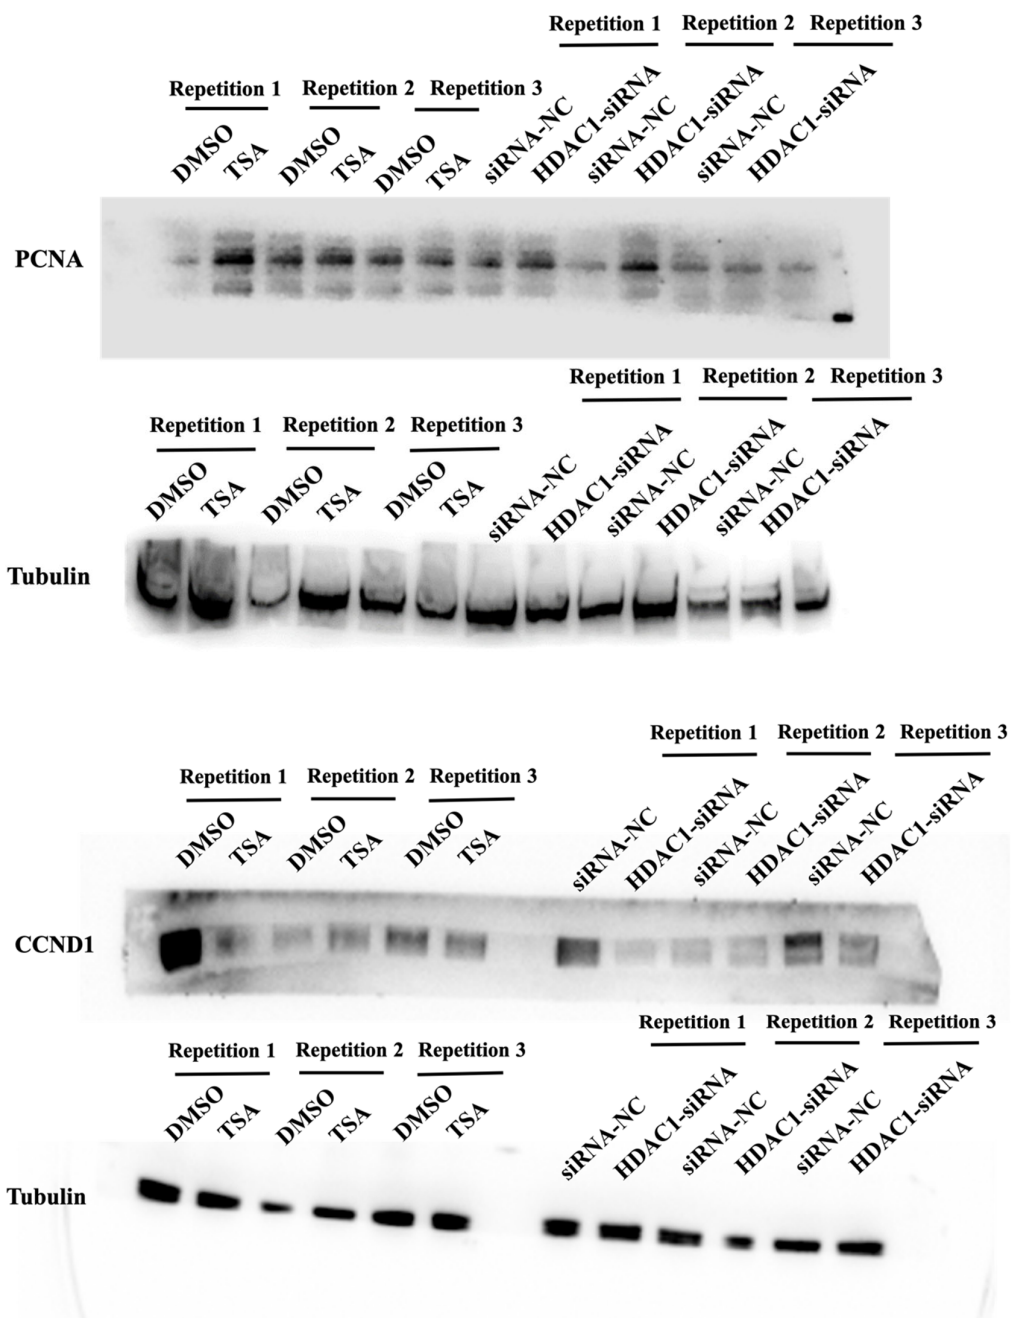

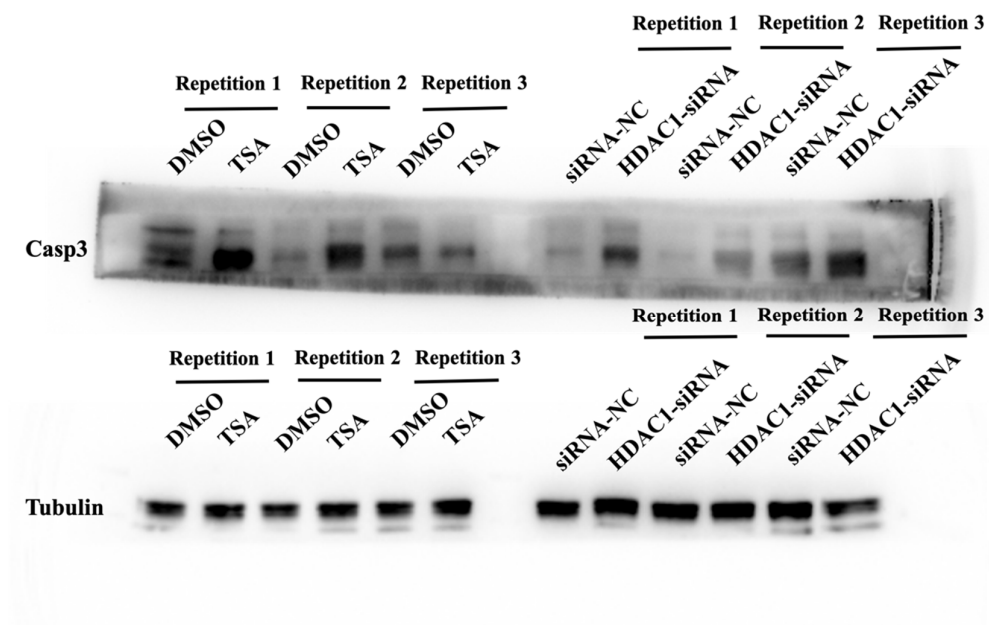

3.The original blots shown in Figure 2J.

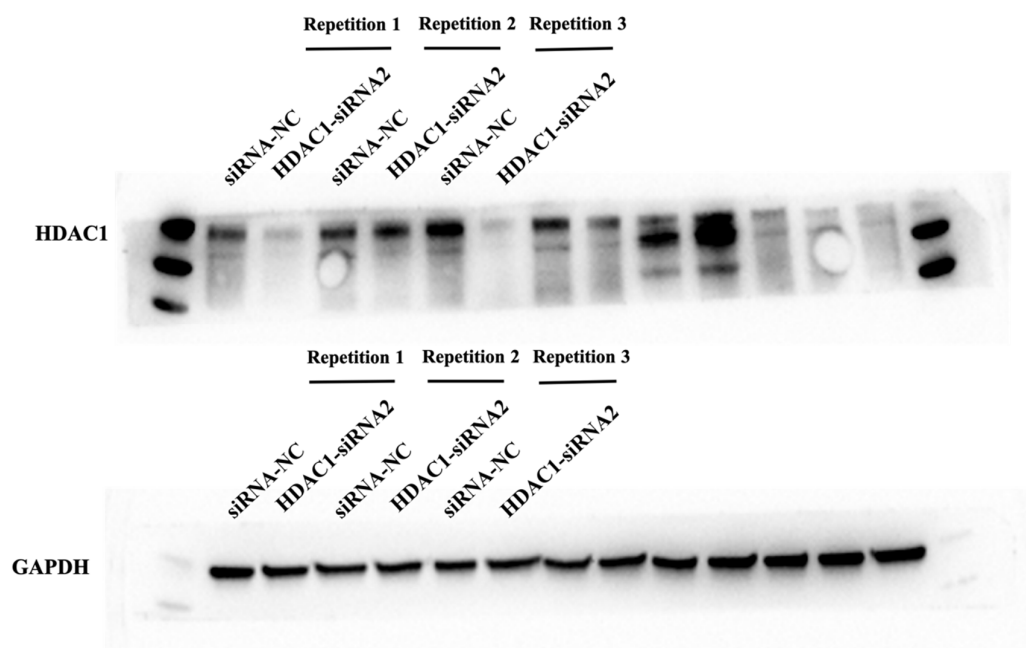

4.The original blots shown in Figure 4D and H.

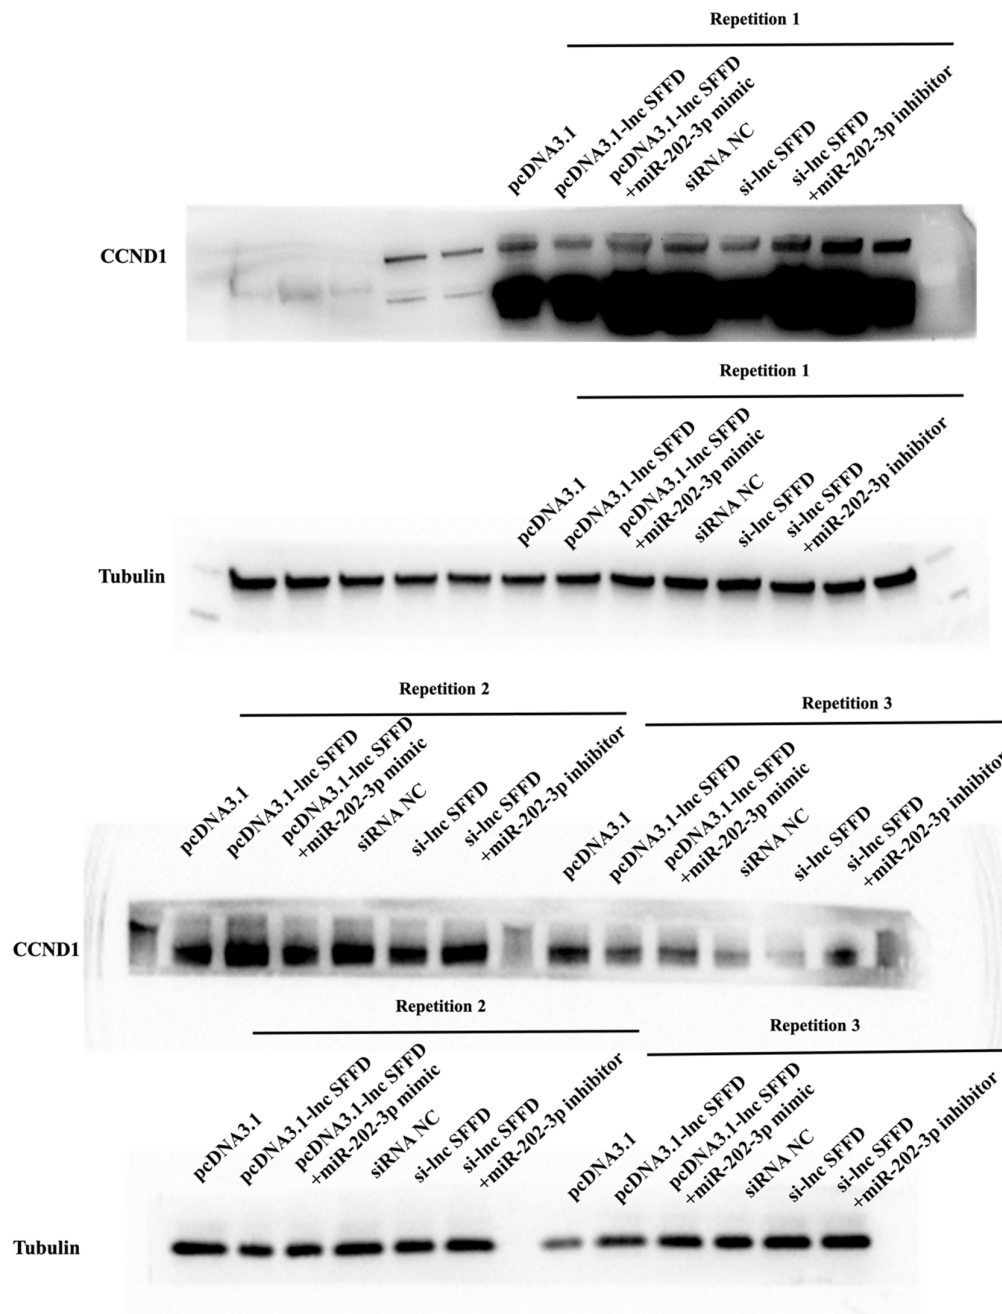

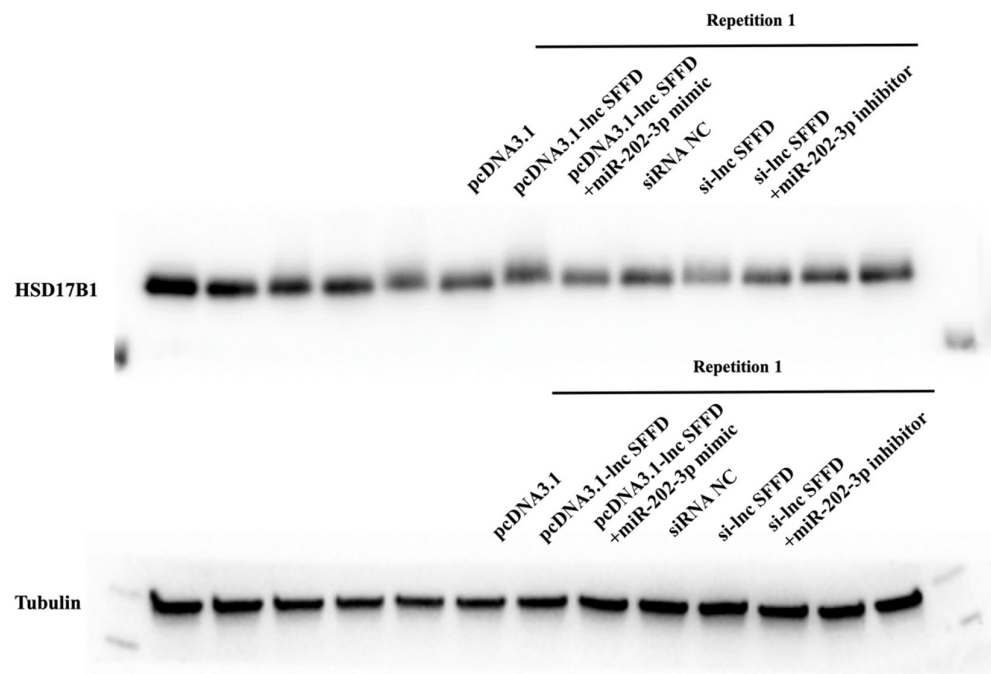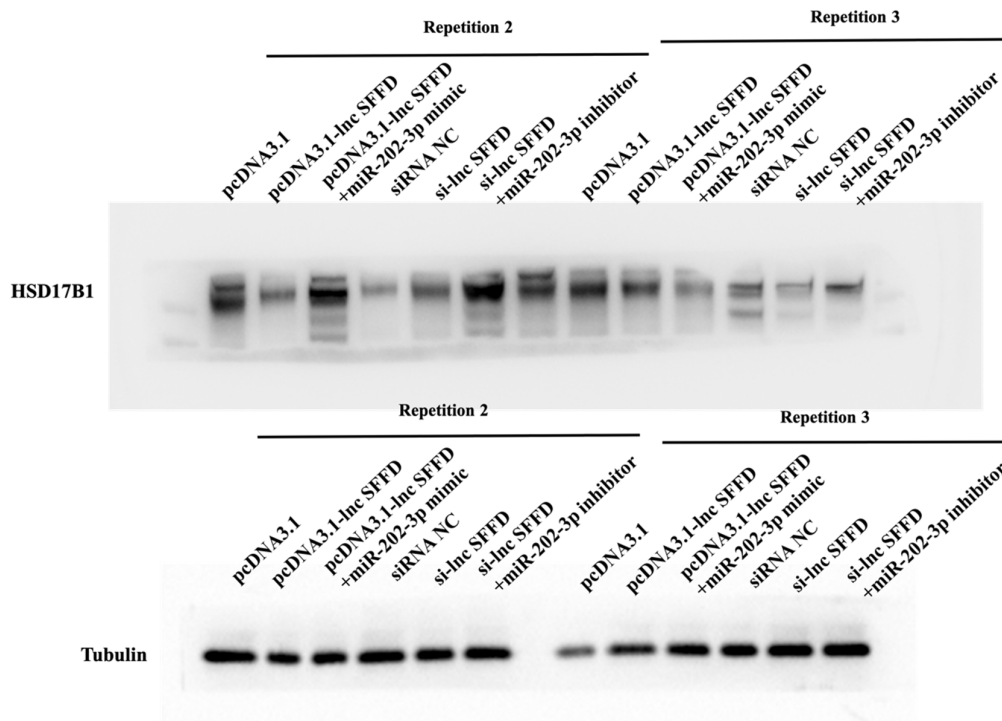

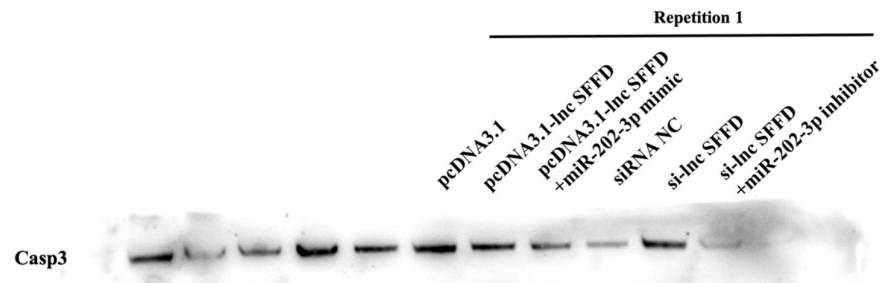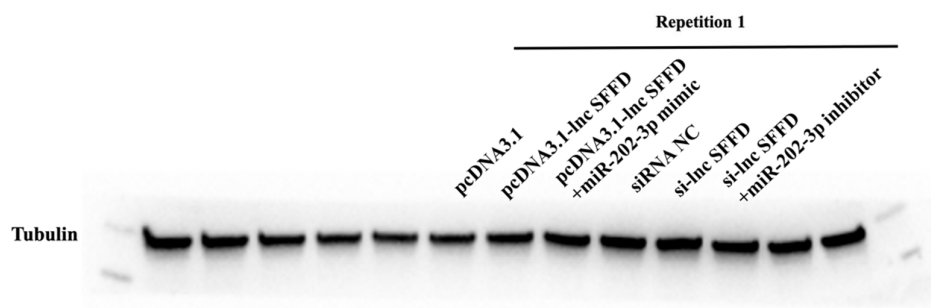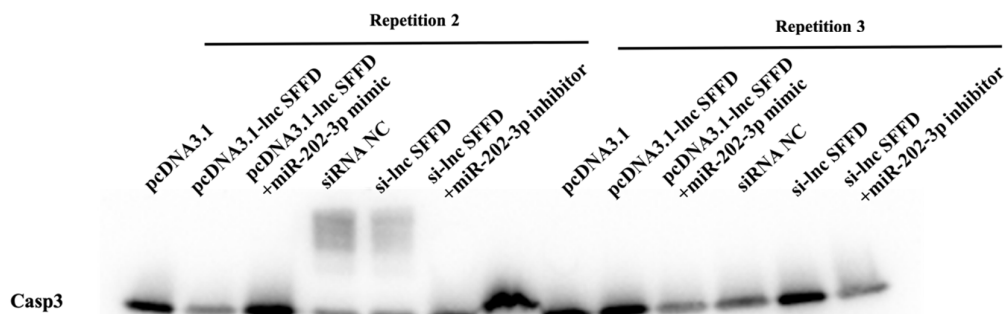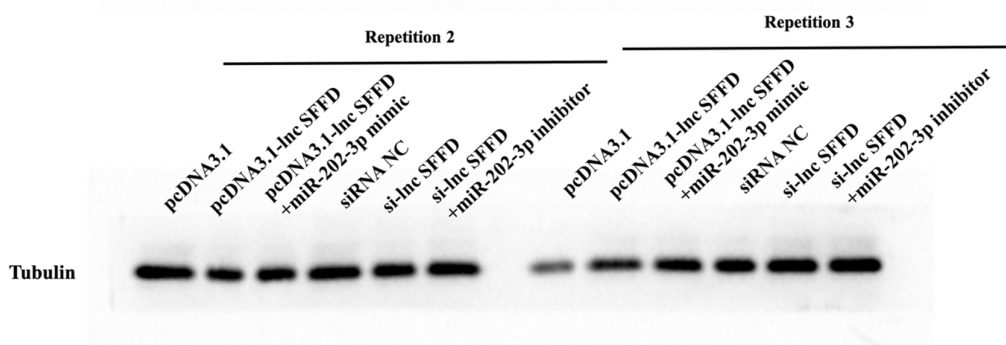

5.The original blots shown in Figure 6F.

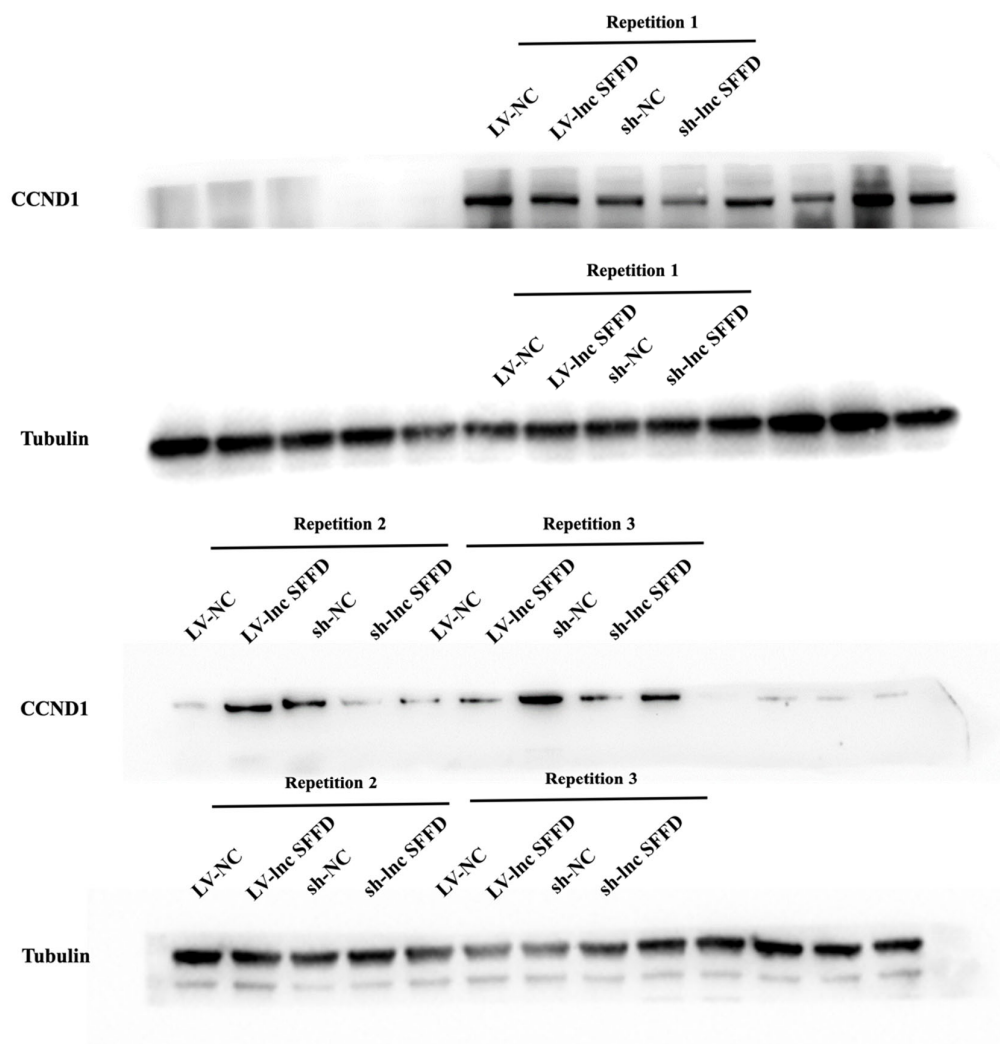

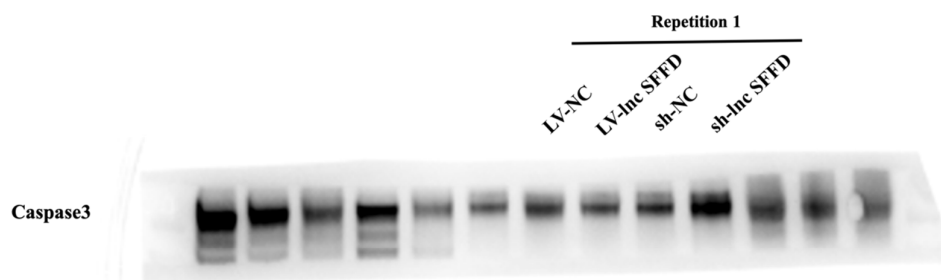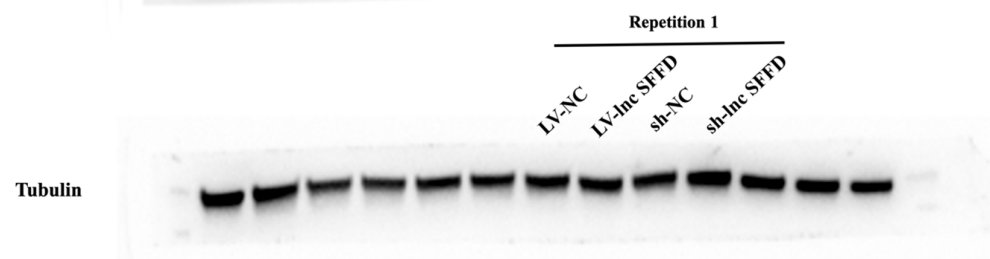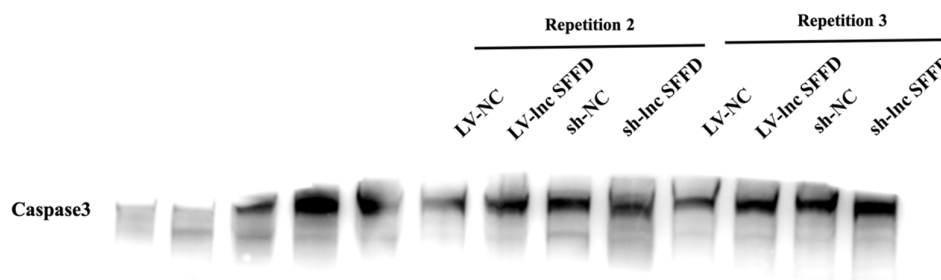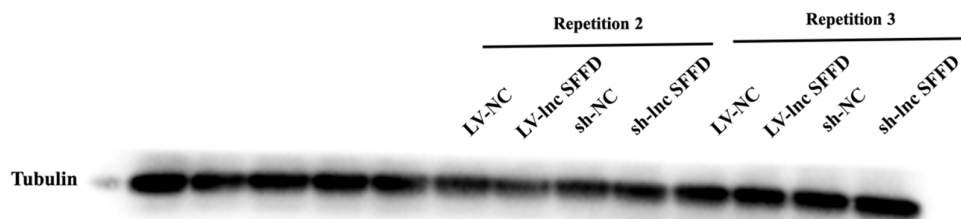



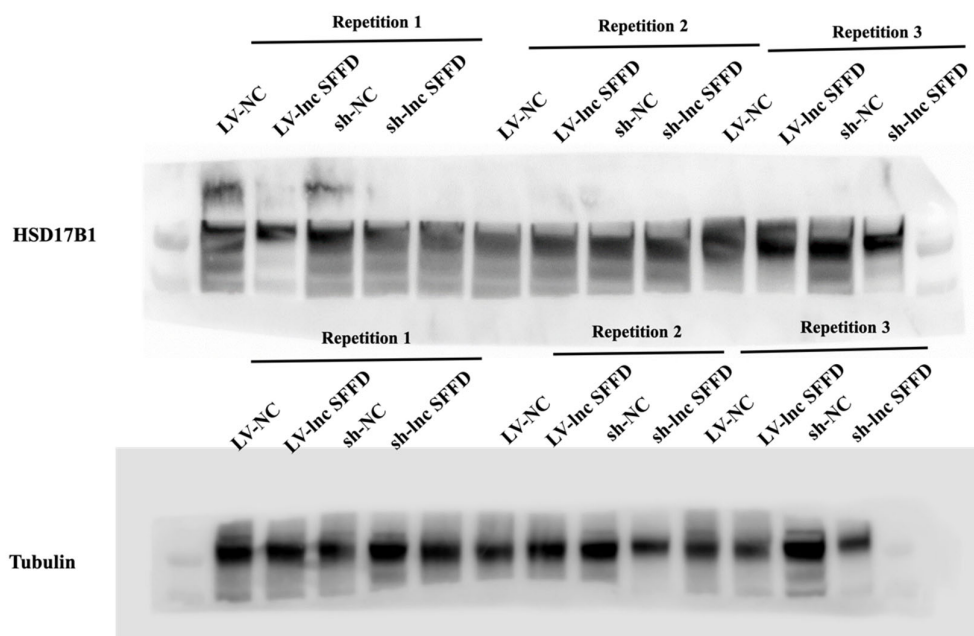

Supplement: s1 [file s1]
