# Supplementary material for: HDAC1-Mediated lncRNA Stimulatory Factor of Follicular Development to Inhibit the Apoptosis of Granulosa Cells and Regulate Sexual Maturity through miR-202-3p-COX1 Axis
Source: MDPI journal article supplement (doi:10.3390/cells12232734), 2023-11-29
Supplement: s1 [file s1]

**Table S1 Primers used for vector construction**

| Primer name               | Primer sequences (5' to 3')                                                            |
|---------------------------|----------------------------------------------------------------------------------------|
| pcDNA3.1- lnc SFFD        | F: CCAAGCTTACTACATGCTTGAGGAGGGTG<br>R: GGGGTACCCGCGGTCATACGATTAACCCA                   |
| lnc SFFD-WT               | F: CGAGCTCACTACATGCTTGAGGAGGGTG<br>R: GCGTCGACCGCGGTCATACGATTAACCCA                    |
| lnc SFFD-MUT              | F: AATGAGAGAGGAAAAGGTCGTCCCTTTCCAGGTATGGC<br>R: GCCATACCTGGAAAGGGACGACCTTTTCCTCTCTCATT |
| COX1-WT                   | F: CGAGCTCCAAGCACCAGAATCGGACCC<br>R: GCGTCGACTCTCAAGGCGGCGAAGAGTA                      |
| COX1-MUT                  | F: TTTCCAACCCATAAGCTACACCTTGACCTAACGTTTTT<br>R: AAAAACGTTAGGTCAAGGTGTAGCTTATGGGTTGGAAA |
| pcDNA3.1-EGFP             | F: GGCTAGCCATGGTGAGCAAGGGCGAGGAG<br>R: CAAGCTTGTTACTTGTACAGCTCGTCCA                    |
| pcDNA3.1-EGFP-MUT         | F: GGCTAGCCGTGAGCAAGGGCGAGGAGCTG<br>R: CAAGCTTGTTACTTGTACAGCTCGTCCA                    |
| pcDNA3.1-ORF+<br>EGFP-MUT | F: GGCTAGCCACTACATGCTTGAGGAGGGTG<br>R: CAAGCTTGCGCGGTCATACGATTAACCCA                   |

Sequences underlined represent the enzyme cutting sites

**Table S2 Oligonucleotide sequences in this study**

| Fragment name        | Sequences (5' to 3')   |
|----------------------|------------------------|
| MiR-202-3p mimic     | AGCUACAUUGUCUGCUGGGUUU |
| MiR-202-3p inhibitor | AAACCCAGCAGACAAUGUAGCU |
| HDAC1-siRNA          | CCGGTCATGTCCAAAGTAA    |
| COX1-siRNA           | GATTATCCTGACGCATACA    |
| Si-lnc SFFD          | GUAGCCCAUUUCUUUCCAA    |
